# Supplementary material for: Laparoscopic Surgery with Concomitant Hernia Repair and Cholecystectomy: An Alternative Approach to Everyday Practice
Source: MDPI journal article supplement (doi:10.3390/diseases11010044), 2023-03-03
Supplement: s1 [file s1]

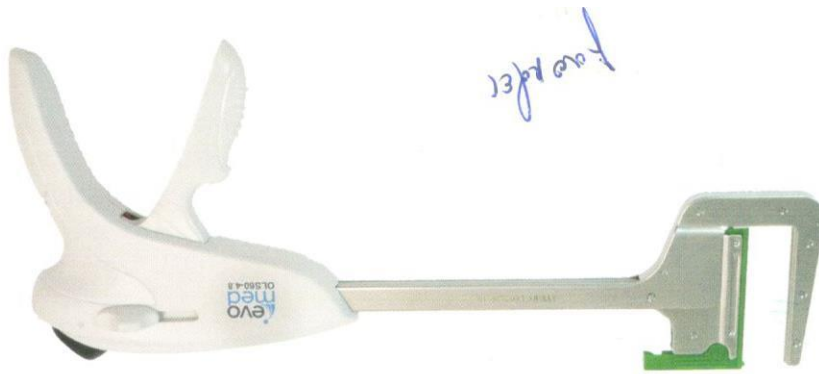

ηλεκτρική

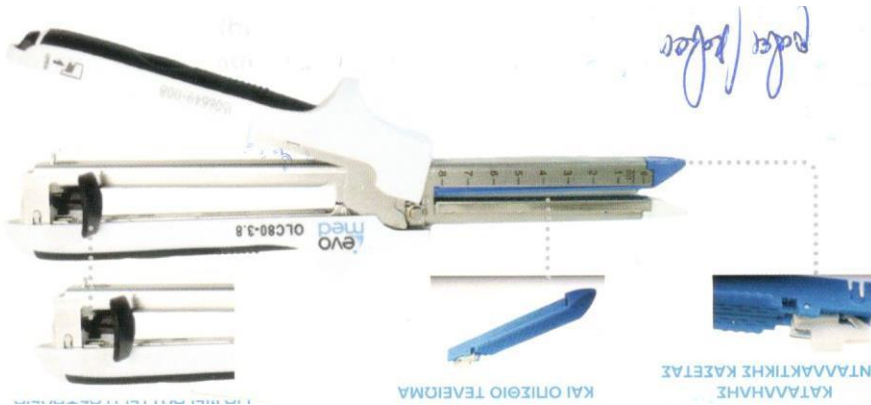

ηλεκτρική

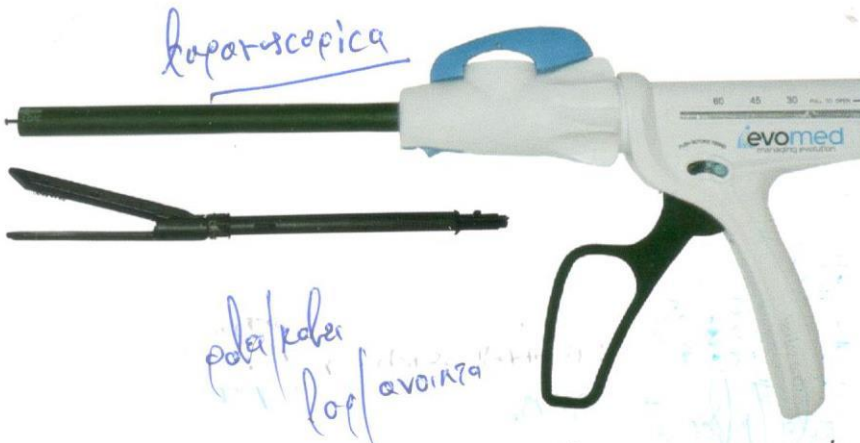

laparoscopica

ηλεκτρική  
λογ/αυτοκίνητη

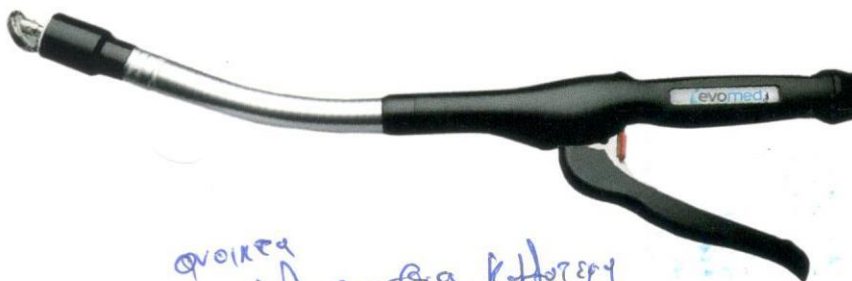

αυτοκίνητη  
αυτοκίνητη κίνηση

## με Σταθερή Κεφαλή V series

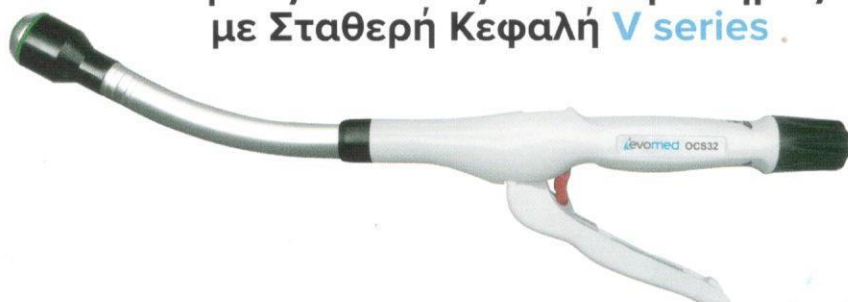

ΑΠΟΣΠΩΜΕΝΗ ΚΕΦΑΛΗ  
ΧΑΜΗΛΟΥ ΠΡΟΦΙΛ

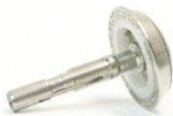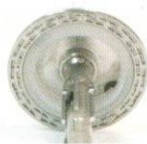

ΔΙΠΛΗ ΤΑΧΥΤΗΤΑ  
ΑΝΟΙΓΜΑΤΟΣ

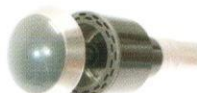

ΛΑΜΑ ΕΚΤΟΜΗΣ  
ΑΠΟ ΧΕΙΡΟΥΡΓΙΚΟ ΑΤΣΑΛΙ

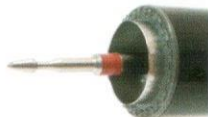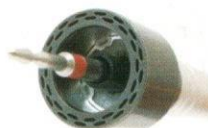

ΔΕΙΚΤΗΣ ΣΥΜΠΙΕΣΗΣ  
ΠΛΗΡΩΣ ΟΡΑΤΟΣ

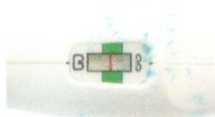

## V series

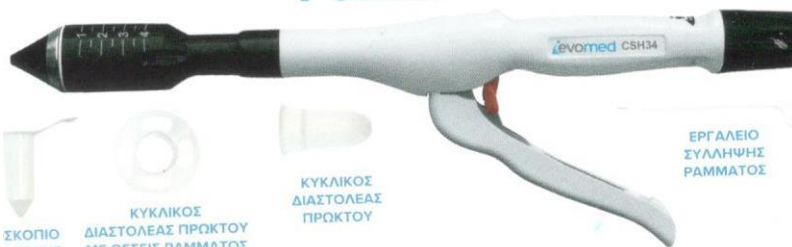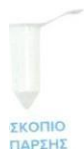

ΣΚΟΠΙΟ  
ΠΑΡΣΗΣ

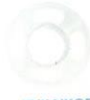

ΚΥΚΛΙΚΟΣ  
ΔΙΑΣΤΟΛΕΑΣ ΠΡΩΚΤΟΥ  
ΜΕ ΘΕΣΕΙΣ ΡΑΜΜΑΤΟΣ

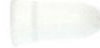

ΚΥΚΛΙΚΟΣ  
ΔΙΑΣΤΟΛΕΑΣ  
ΠΡΩΚΤΟΥ

ΕΡΓΑΛΕΙΟ  
ΣΥΛΛΗΨΗΣ  
ΡΑΜΜΑΤΟΣ

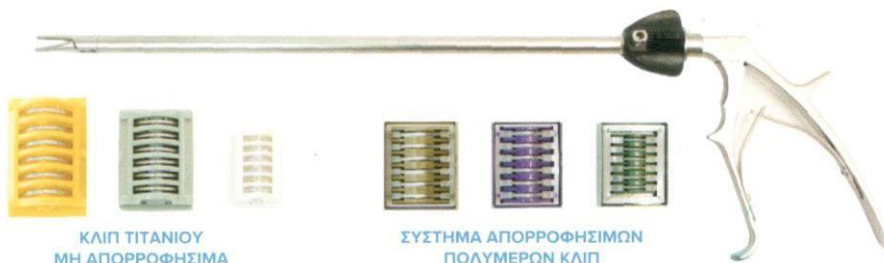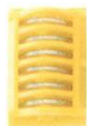

ΚΛΙΠ ΤΙΤΑΝΙΟΥ  
ΜΗ ΑΠΟΡΡΟΦΗΣΙΜΑ

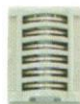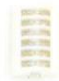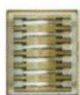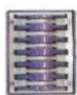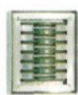

ΣΥΣΤΗΜΑ ΑΠΟΡΡΟΦΗΣΙΜΩΝ  
ΠΟΛΥΜΕΡΩΝ ΚΛΙΠ

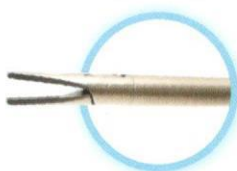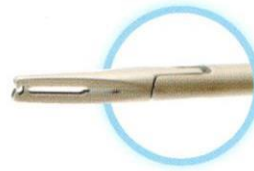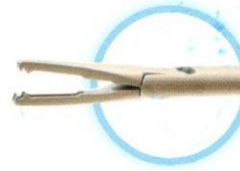

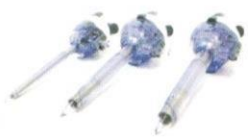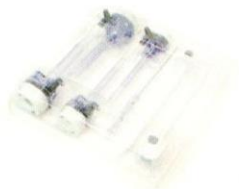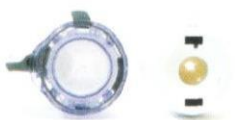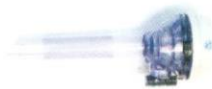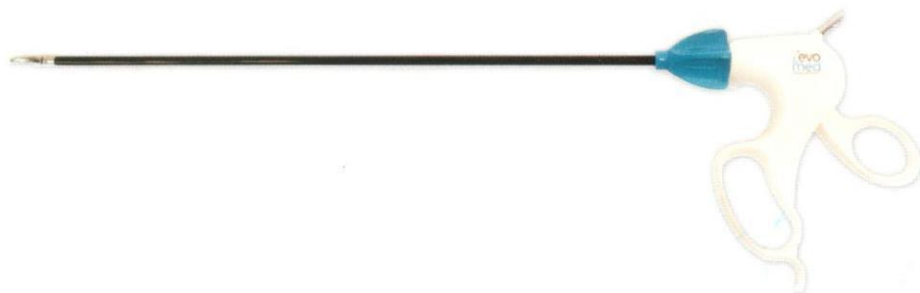

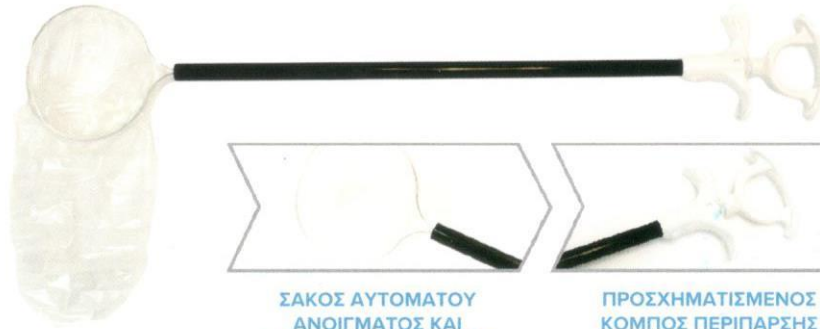

ΣΑΚΟΣ  
ΠΟΛΥΟΥΡΕΘΑΝΗΣ  
ΧΩΡΙΣ ΠΟΡΟΥΣ

ΣΑΚΟΣ ΑΥΤΟΜΑΤΟΥ  
ΑΝΟΙΓΜΑΤΟΣ ΚΑΙ  
ΕΥΚΟΛΟΥ ΚΛΕΙΣΙΜΑΤΟΣ

ΠΡΟΣΧΗΜΑΤΙΣΜΕΝΟΣ  
ΚΟΜΠΟΣ ΠΕΡΙΠΑΡΣΗΣ

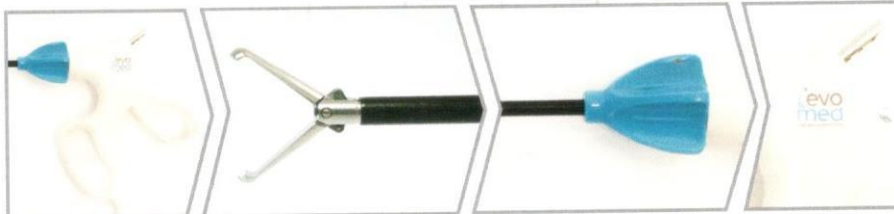

ΠΡΟΣΧΗΜΑΤΙΣΜΕΝΟΣ

ΕΥΚΟΛΟ ΑΝΟΙΓΜΑ

360°

ΠΛΗΡΩΣ
